# Supplementary material for: Photothermal/matrix metalloproteinase-2 dual-responsive gelatin nanoparticles for breast cancer treatment
Source: PubMed Central journal article supplement — Acta Pharm Sin B. 2020 Aug 26;11(1):271–82. doi: 10.1016/j.apsb.2020.08.009 (PMC7838055; doi:10.1016/j.apsb.2020.08.009), 2020-08-26
Supplement: mmc1.pdf [file mmc1.pdf]

## Supporting Information for

## ORIGINAL ARTICLE

### Photothermal/matrix metalloproteinase-2 dual-responsive gelatin nanoparticles for breast cancer treatment

Xiaojie Chen<sup>a</sup>, Jiafeng Zou<sup>a</sup>, Ke Zhang<sup>a</sup>, Jingjing Zhu<sup>a</sup>, Yue Zhang<sup>a</sup>,  
Zhihong Zhu<sup>a</sup>, Hongyue Zheng<sup>b</sup>, Fanzhu Li<sup>a,\*</sup>, Ji-Gang Piao<sup>a</sup>

<sup>a</sup>College of Pharmaceutical Sciences, Zhejiang Chinese Medical University, Hangzhou 310053, China

<sup>b</sup>Libraries of Zhejiang Chinese Medical University, Zhejiang Chinese Medical University, Hangzhou 310053, China

Received 23 June 2020; received in revised form 7 August 2020; accepted 11 August 2020

\*Corresponding authors. Tel.: +86 571 61768130.

E-mail addresses: lifanzhu@zcmu.edu.cn (Fanzhu Li), jgpiao@zcmu.edu.cn (Ji-Gang Piao).

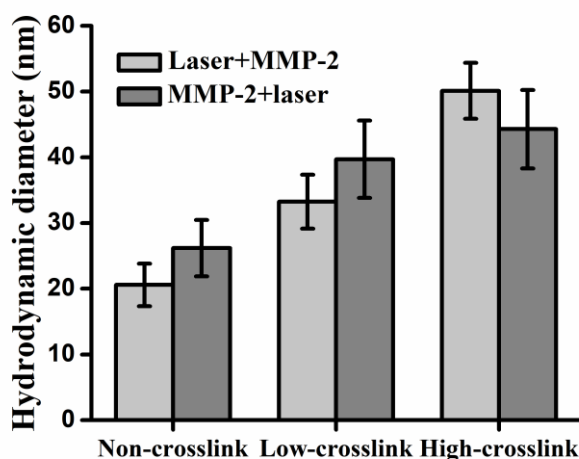

**Figure S1** Hydrodynamic diameter of different crosslinked GNP-DOX/ICG treated with laser irradiation and MMP-2 incubation sequentially. Data are presented as mean  $\pm$  SD,  $n=3$ .

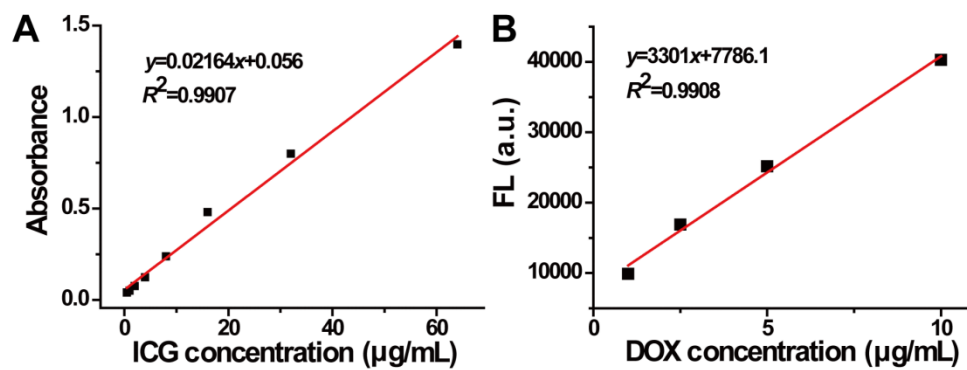

**Figure S2** (A) The standard curve of absorption of ICG as a function of concentration, the absorption was measured at 800 nm. (B) The standard curve of fluorescence of DOX as a function of concentration, the fluorescence was measured at 595 nm.

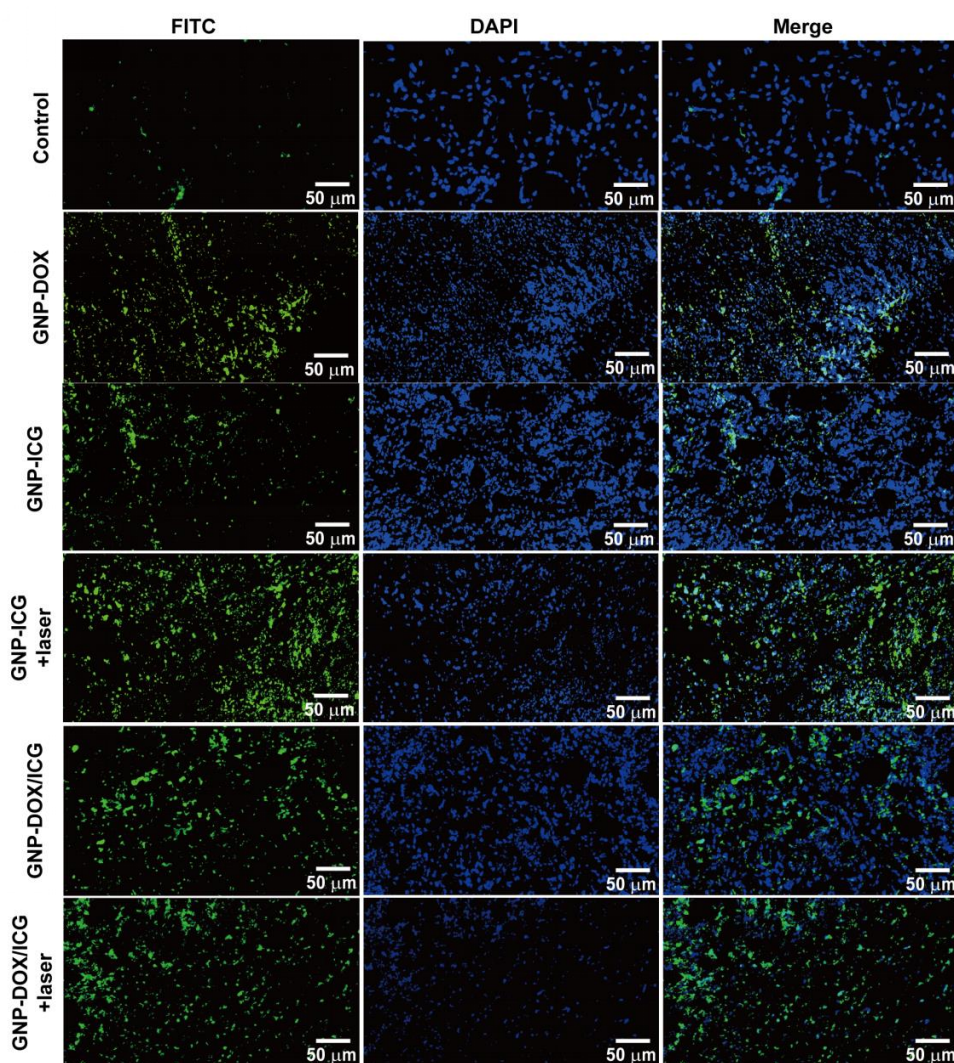

**Figure S3** TUNEL immunofluorescence of tumors after PBS, GNP-DOX, GNP-ICG, GNP-ICG+laser, GNP-DOX/ICG, and GNP-DOX/ICG+laser treatment.

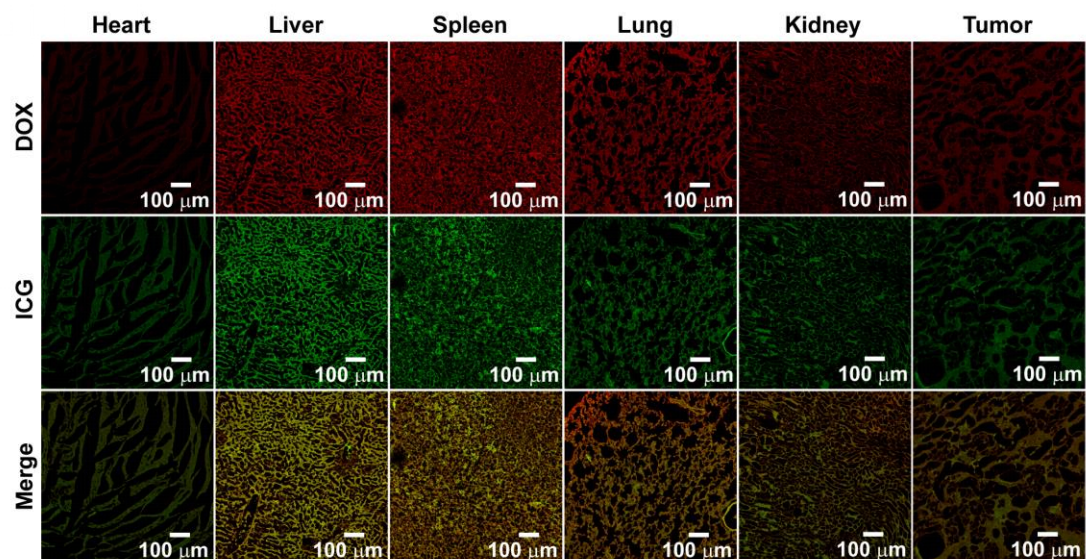

**Figure S4** Fluorescent distribution in 4T1 tissue slices after GNP-DOX/ICG treatment.

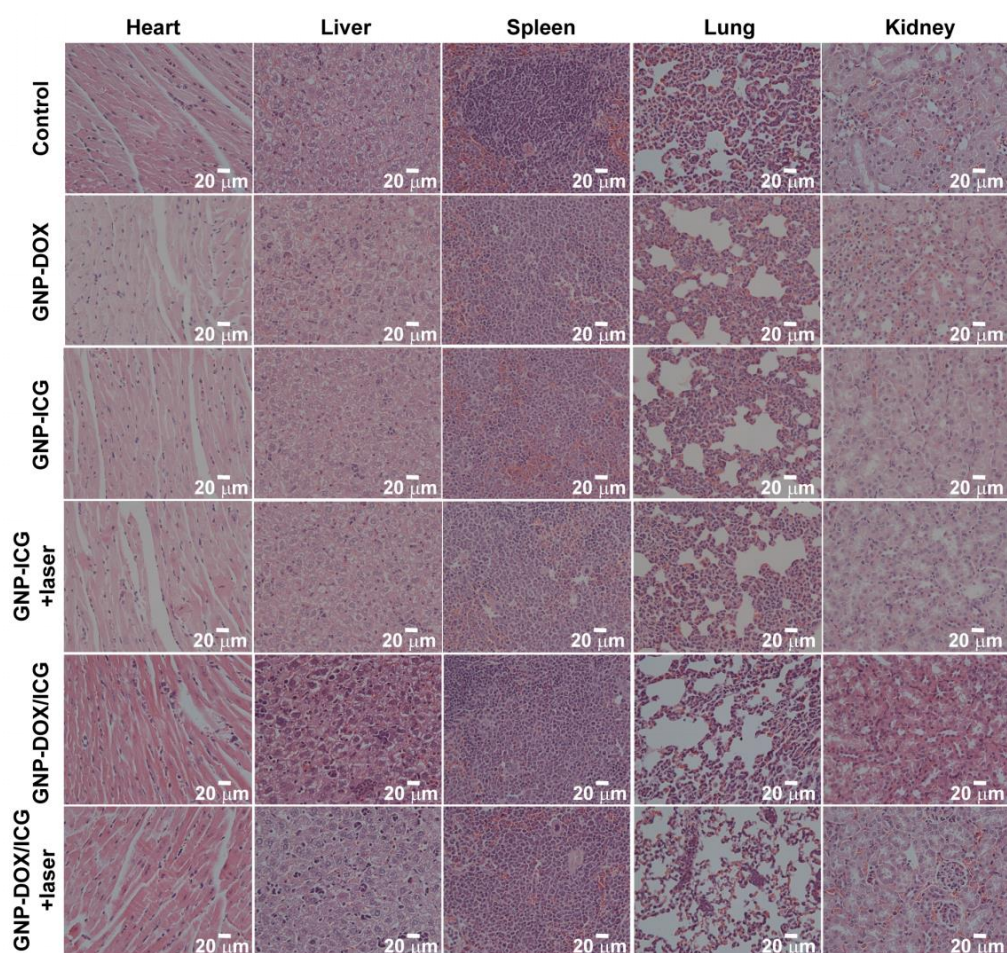

**Figure S5** H&E staining images of major organs collected from mice on Day 21 after treatment with PBS, GNP-DOX, GNP-ICG, GNP-ICG+laser, GNP-DOX/ICG, and GNP-DOX/ICG+laser, respectively.
